# Supplementary material for: Genome-Wide Analysis of mir-548 Gene Family Reveals Evolutionary and Functional Implications
Source: Hindawi journal article supplement (doi:10.1155/2012/679563), 2012-01-01

A

```

***** ** * ** *   ***** **   **   **   ***** * ** *****
548f-2 ATTACGTTGGTGCGAACATAATTGCAGTTTTTATCACTACTTT---TAATGGCAAAAACTGTAATTACTTTTGCACCAAC-CTAATA
548f-3 ATTAGGTTGGTGCAAACCTAATTGCAAATTTTGCAGTTTTTTAAGTAAATTGCAAAAACTGTAATTACTTTTGCACCAAC-CTAATA
548f-1 ATTAGGTTGGTGCAAAGTAATCACAGTTTTTGACATTACTTT---CAAAGACAAAACTGTAATTACTTTTGGACCAAC-CTAATA
548f-4 ATTAGGTTGGTGCAAAGTAATAGTGGTTTTTGCCTAAAAG---TAATGACAAAACTGTAATTACTTTTGGACAATATTAATA
548f-5 ATTAGGTTGCTGCAAAGTAATCATGTTTTTTCCATTGTAAG---TAATGGGAAAACTGTAATTACTTTTGTACCAAC-CTAATA
  
```

B

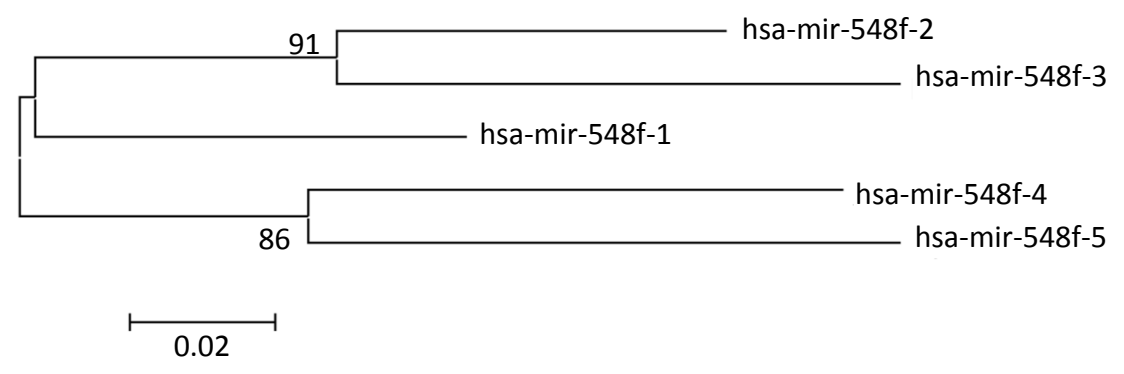

Supplement: f1 [file 679563.f1.pdf]
