# Supplementary material for: Genome-Wide Analysis of mir-548 Gene Family Reveals Evolutionary and Functional Implications
Source: Hindawi journal article supplement (doi:10.1155/2012/679563), 2012-01-01
Supplement: f3 [file 679563.f3.pdf]

A  
hsa-miR-548aa  
5' AAAAACCACAAUACUUUUGCACCA 3'  
|||||  
3' CCGUUUUUGGUGUAAUGAAAA 5'  
hsa-miR-548d-5p

B  
hsa-miR-548h-3p  
5' CAAAAACCGCAAUACUUUUGCA 3'  
|||||  
3' CCGUUUUUGGCGUAAUGAAAA 5'  
hsa-miR-548d-5p

C  
has-miR-548c-3p  
5' CAAAAUCUCAAUACUUUUGC 3'  
|||||  
3' CCGUUUUUGGCGUAAUGAAAA 5'  
hsa-miR-548c-5p
