# Supplementary figures and images for: Genome-Wide Analysis of mir-548 Gene Family Reveals Evolutionary and Functional Implications
Source: Hindawi journal article supplement (doi:10.1155/2012/679563), 2012-01-01

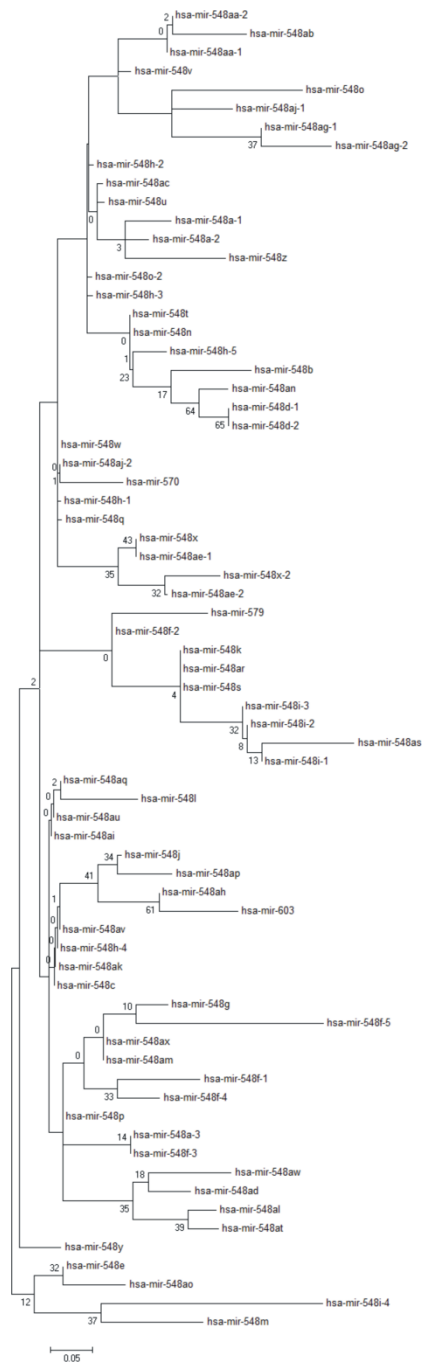

Supplement: f2 [file 679563.f2.pdf]

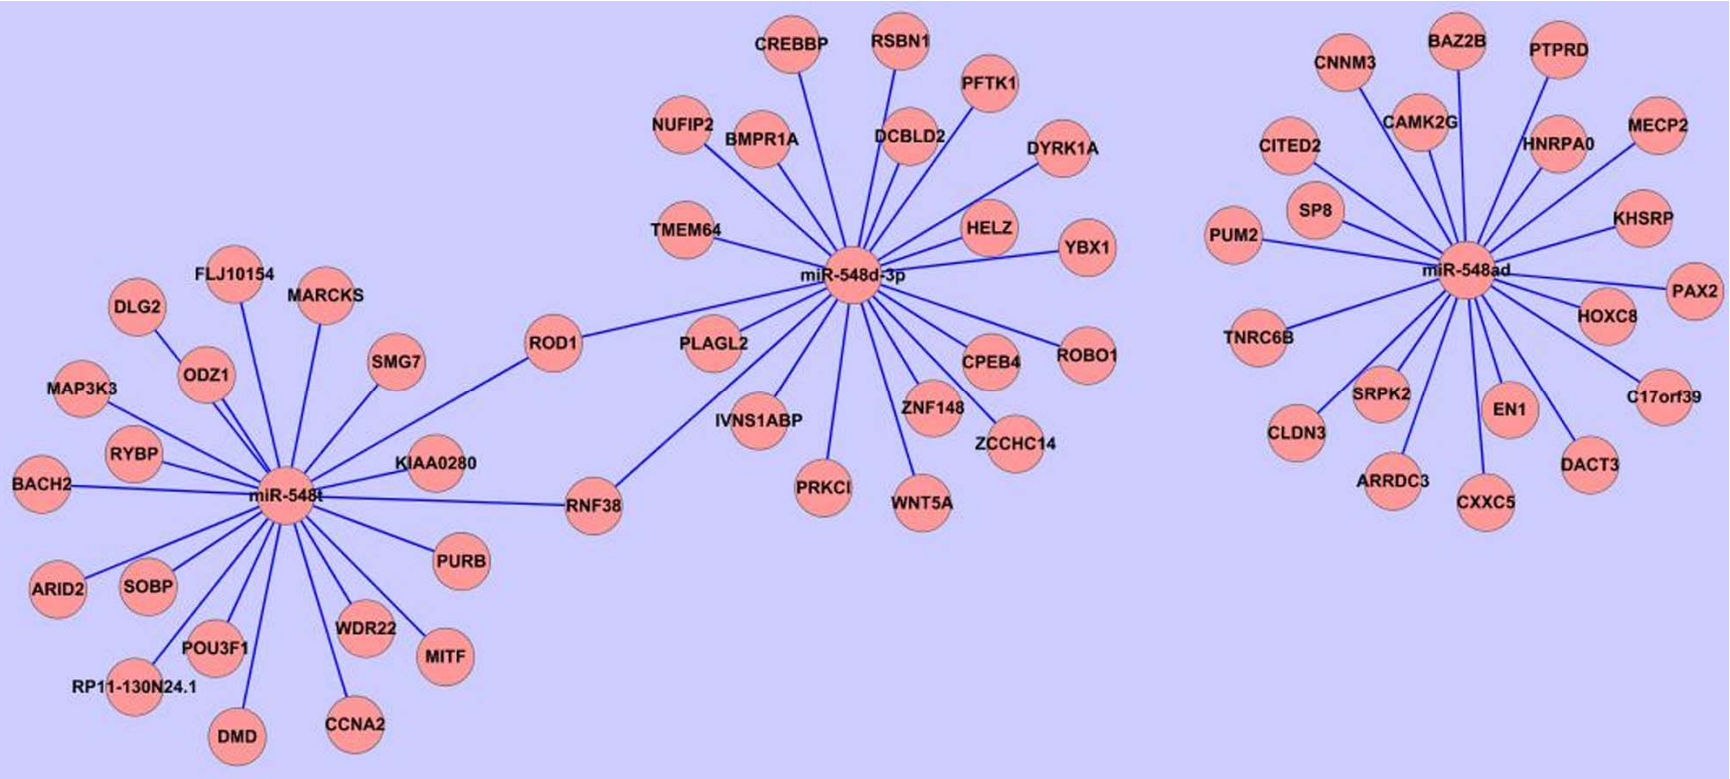

Supplement: f4 [file 679563.f4.pdf]
